# Supplementary material for: Chitin Synthesis and Degradation in Crustaceans: A Genomic View and Application
Source: MDPI journal article supplement (doi:10.3390/md19030153), 2021-03-15
Supplement: s1 [file s1]

## Supplementary Materials

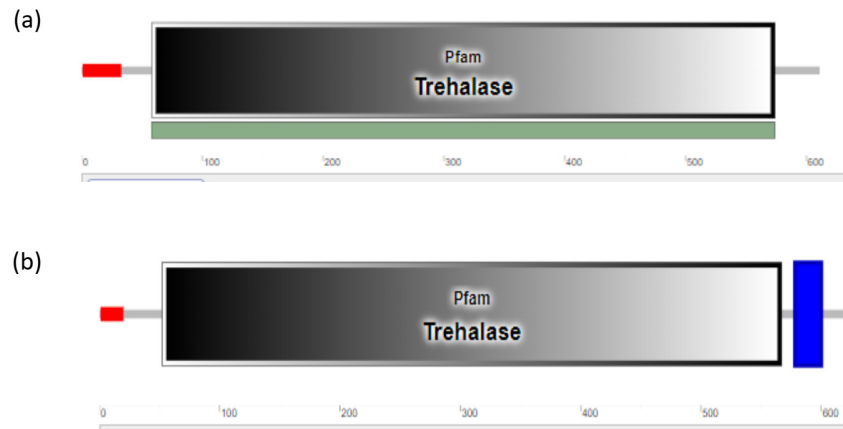

**Supplement Figure 1.** The protein domain architecture of trehalase genes of *L. vannamei* was predicted by SMART online program (<http://smart.embl-heidelberg.de/>). (a) *LvTre1*, (b) *LvTre2*.

|                |                       |                    |                                                           |
|----------------|-----------------------|--------------------|-----------------------------------------------------------|
| XP 027209266.1 | Gfat-like isoform X10 | [Penaeus vannamei] | TKTLATDEIPWLYS-----DHRPHANDIFATGFNR                       |
| XP 027209265.1 | Gfat-like isoform X9  | [Penaeus vannamei] | TKTLATDEIPWLYS D-----NQDHRPHANDIFATGFNR                   |
| XP 027209264.1 | Gfat-like isoform X8  | [Penaeus vannamei] | TKTLATDEIPWLYS DSPKVELK-----DHRPHANDIFATGFNR              |
| XP 027209263.1 | Gfat-like isoform X7  | [Penaeus vannamei] | TKTLATDEIPWLYS DSPKVELK-----DNQDHRPHANDIFATGFNR           |
| XP 027209262.1 | Gfat-like isoform X6  | [Penaeus vannamei] | TKTLATDEIPWLYS DVVEFGGRSLGARERD-----HRPHANDIFATGFNR       |
| XP 027209261.1 | Gfat-like isoform X5  | [Penaeus vannamei] | TKTLATDEIPWLYS DVVEFGGRSLGARERD-----DHRPHANDIFATGFNR      |
| XP 027209260.1 | Gfat-like isoform X4  | [Penaeus vannamei] | TKTLATDEIPWLYS DSPKVELKD---LE-----DNQDHRPHANDIFATGFNR     |
| XP 027209259.1 | Gfat-like isoform X3  | [Penaeus vannamei] | TKTLATDEIPWLYS DVVEFGGRSLGARERDN-----QDHRPHANDIFATGFNR    |
| XP 027209257.1 | Gfat-like isoform X1  | [Penaeus vannamei] | TKTLATDEIPWLYS DSPKVELKDLEALPKS-----DNQDHRPHANDIFATGFNR   |
| XP 037775338.1 | Gfat-like isoform X16 | [Penaeus monodon]  | TKTLATDEIPWLYS-----DHRPHANDIFATGFNR                       |
| XP 037775337.1 | Gfat-like isoform X15 | [Penaeus monodon]  | TKTLATDEIPWLYS D-----NQDHRPHANDIFATGFNR                   |
| XP 037775336.1 | Gfat-like isoform X14 | [Penaeus monodon]  | TKTLATDEIPWLYS DSPKVELK-----DHRPHANDIFATGFNR              |
| XP 037775335.1 | Gfat-like isoform X13 | [Penaeus monodon]  | TKTLATDEIPWLYS DSPKVELKD-----NQDHRPHANDIFATGFNR           |
| XP 037775330.1 | Gfat-like isoform X9  | [Penaeus monodon]  | TKTLATDEIPWLYS DSPKVELKDLE-----DNQDHRPHANDIFATGFNR        |
| XP 037775329.1 | Gfat-like isoform X8  | [Penaeus monodon]  | TKTLATDEIPWLYS DVVEFGGRSLGARERD-----HRPHANDIFATGFNR       |
| XP 037775328.1 | Gfat-like isoform X7  | [Penaeus monodon]  | TKTLATDEIPWLYS DSPKVELKRA---LPKS-----DNQDHRPHANDIFATGFNR  |
| XP 037775327.1 | Gfat-like isoform X6  | [Penaeus monodon]  | TKTLATDEIPWLYS DVVEFGGRSLGARERDN-----QDHRPHANDIFATGFNR    |
| XP 037775325.1 | Gfat-like isoform X4  | [Penaeus monodon]  | TKTLATDEIPWLYS DSPKVELKDLEALPKS-----DNQDHRPHANDIFATGFNR   |
| XP 037775324.1 | Gfat-like isoform X3  | [Penaeus monodon]  | TKTLATDEIPWLYS DVVEFGGRSLGARERDLEDN---QDHRPHANDIFATGFNR   |
| XP 037775322.1 | Gfat-like isoform X1  | [Penaeus monodon]  | TKTLATDEIPWLYS DVVEFGGRSLGARERDLEALPKSDNQDHRPHANDIFATGFNR |

**Supplement Figure 2.** The alternative splicing of GFATs in two shrimp *L. vannamei* and *P. monodon*.
